# Supplementary material for: Psychological and pharmacological treatments of intermittent explosive disorder: a meta-analysis protocol
Source: HighWire-hosted journal article supplement (doi:10.1136/bmjopen-2024-083896), 2024-08-01
Supplement: bmjopen-2024-083896supp001_data_supplement.pdf [file bmjopen-2024-083896supp001_data_supplement.pdf]

**Search terms**

IED: Intermittent Explosive Disorder OR IED OR Impulsive

Treatment: Treatment OR Intervention OR Therapy OR Interv\*

Pharmacological: drug OR Pharma\* OR Psychopharm\* OR Antidepressants OR Mood stabilizers

Psychological: CBT OR Cognitive Behavioral Therapy OR Anger management\*

Others: Randomized controlled trial OR Randomised controlled trial OR RCT OR Integrated treatment

**Exemplary search results from Ovid**

APA PsycInfo <1806 to December Week 3 2023>

Embase Classic+Embase <1947 to 2023 Week 51>

Global Health Archive <1910 to 1972>

Global Health <1973 to 2023 Week 51>

Ovid MEDLINE(R) <1946 to December Week 4 2023>

- 1 (Intermittent Explosive Disorder or IED or Impulsive).mp. [mp=ti, ab, tx, ct, sh, hw, id, tc, ot, tm, mf, tn, dm, dv, kf, fx, dq, cw, bt, nm, ox, px, rx, an, ui, sy, ux, mx]95562
- 2 (Treatment or Intervention or Therapy or Interv\*).mp. [mp=ti, ab, tx, ct, sh, hw, id, tc, ot, tm, mf, tn, dm, dv, kf, fx, dq, cw, bt, nm, ox, px, rx, an, ui, sy, ux, mx] 32840737
- 3 (drug or Pharma\* or Psychopharm\* or Antidepressants or Mood stabilizers).mp. [mp=ti, ab, tx, ct, sh, hw, id, tc, ot, tm, mf, tn, dm, dv, kf, fx, dq, cw, bt, nm, ox, px, rx, an, ui, sy, ux, mx] 26570520
- 4 (CBT or Cognitive Behavioral Therapy or Anger management\*).mp. [mp=ti, ab, tx, ct, sh, hw, id, tc, ot, tm, mf, tn, dm, dv, kf, fx, dq, cw, bt, nm, ox, px, rx, an, ui, sy, ux, mx] 170398
- 5 (Randomized controlled trial or Randomised controlled trial or RCT or Integrated treatment).mp. [mp=ti, ab, tx, ct, sh, hw, id, tc, ot, tm, mf, tn, dm, dv, kf, fx, dq, cw, bt, nm, ox, px, rx, an, ui, sy, ux, mx] 2129647
- 6 1 and 2 and 3 and 4 and 5 518

**Exemplary search results from CENTRAL**

"Intermittent Explosive Disorder" AND (treatment OR intervention OR therapy) AND (pharmacological OR drug OR psychopharmacology OR antidepressants OR mood stabilizers) AND (psychological OR CBT OR "Cognitive Behavioral Therapy" OR "anger management") AND ("Randomized controlled trial" OR RCT OR "integrated treatment")

**932 results for "Intermittent Explosive Disorder OR IED OR Impulsive" anywhere and "Treatment OR Intervention OR Therapy OR Interv\*" anywhere and "drug OR Pharma\* OR Psychopharm\* OR Antidepressants OR Mood stabilizers" anywhere and "CBT OR Cognitive Behavioral Therapy OR Anger management\*" anywhere and "Randomized controlled trial OR Randomised controlled trial OR RCT OR Integrated treatment" anywhere**
